# Supplementary material
Source: PubMed Central journal article supplement (PMC3386544)

### **Supplemental Figure 1**

Generation and initial characterization of NCoR $\Delta$ ID mice. (A) Schematic representation of the approach employed to generate a mouse strain with global expression of the mutant NCoR lacking N3 and N2 RIDs (NCoR $\Delta$ ID). (B) NCoR protein expression in different tissues of WT and NCoR $\Delta$ ID mice. Total protein extracts were isolated from liver, heart and quadriceps muscle of NCoR $\Delta$ ID, WT and heterozygous mice and analyzed by Western blotting using anti-NCoR antibody raised against the C-terminus of NCoR.

### **Supplemental Figure 2, associated with figures 3, 4 and 5**

Total serum T<sub>3</sub> as measured by RIA in adult male mice with indicated genotypes, after 3 weeks of feeding with Low Iodine/PTU diet, 3 days of T<sub>3</sub> replacement at 0.2  $\mu$ g/100 g of body weight or 4 days at 0.5 $\mu$ g/100 g of body weight; n =3-8 animals per group.

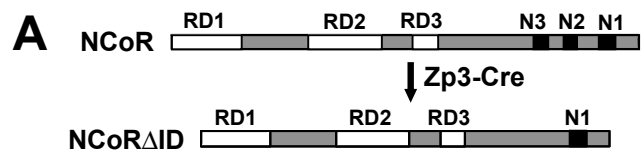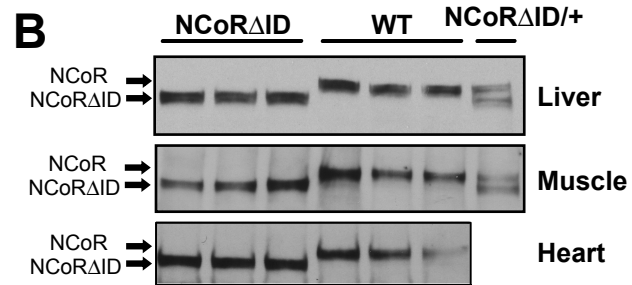

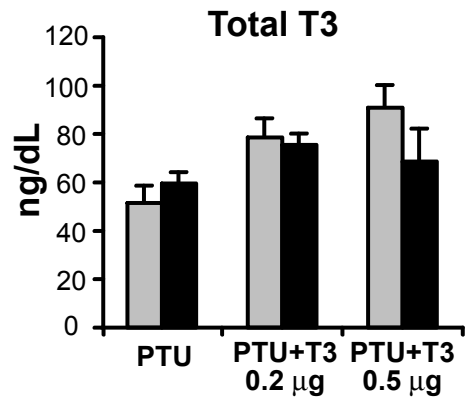

Supplement: supp_me.2010-0462_me-10-0462_Figs_1_and_2.pdf [file supp_me.2010-0462_me-10-0462_Figs_1_and_2.pdf]
